# Supplementary material
Source: MDPI journal article supplement (https://www.mdpi.com/2073-4344/11/7/759)
Supplement: s1 [file s1]

# The H<sub>2</sub>O Effect on Cu Speciation in Cu-CHA-Catalysts for NH<sub>3</sub>-SCR Probed by NH<sub>3</sub> Titration

Roberta Villamaina <sup>1</sup>, Federica Gramigni <sup>1</sup>, Umberto Iacobone <sup>1</sup>, Shaojun Liu <sup>1</sup>, Isabella Nova <sup>1</sup>, Enrico Tronconi <sup>1,\*</sup>, Maria Pia Ruggeri <sup>2</sup>, Jillian Collier <sup>2</sup>, Andrew P. E. York <sup>2</sup> and David Thompsett <sup>2</sup>

<sup>1</sup> Laboratory of Catalysis and Catalytic Processes, Dipartimento di Energia, Politecnico di Milano, via La Masa 34, 20156 Milano, Italy; roberta.villamaina@polimi.it (R.V.); federica.gramigni@polimi.it (F.G.);

umberto.iacobone@polimi.it (U.I.); shaojun.liu@polimi.it (S.L.); isabella.nova@polimi.it (I.N.)

<sup>2</sup> Johnson Matthey Technology Centre, Blounts Court Road, Sonning Common, Reading RG4 9NH, UK; MariaPia.Ruggeri@matthey.com (M.P.R.); jillian.collier@matthey.com (J.C.); andrew.york@matthey.com (A.P.E.Y.); david.thompsett@matthey.com (D.T.)

\* Correspondence: enrico.tronconi@polimi.it

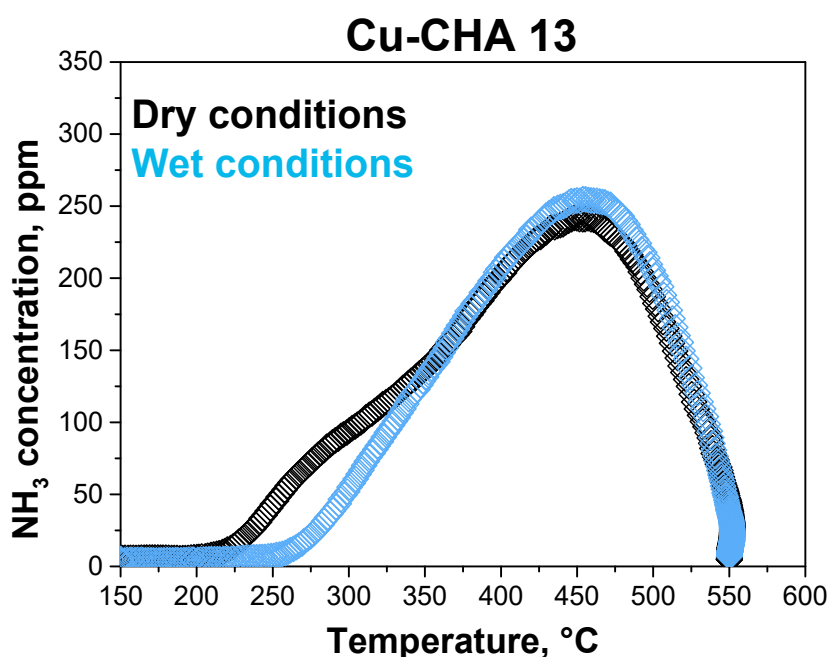

**Figure S1.** Comparison between dry and wet NH<sub>3</sub>-TPD after adsorption at 150 °C on H-CHA catalysts with SAR=13. NH<sub>3</sub>= 500 ppm, H<sub>2</sub>O= 0-5% v/v; heating rate= 15 °C/min, He. GHSV= 266250 cm<sup>3</sup>/(g<sub>cat</sub>\*h) (STP).

**Table S1** NH<sub>3</sub> adsorbed on different sites as estimated from NH<sub>3</sub>-TPD deconvolution under dry conditions

| SAMPLE                 | Cu loaded,<br>μmol | NH <sub>3</sub> Lewis,<br>μmol | NH <sub>3</sub> Bronsted,<br>μmol | NH <sub>3</sub> extra -<br>framework,<br>μmol | NH <sub>3</sub> /Cu <sup>a</sup> | NH <sub>3</sub> physisorbed,<br>μmol | NH <sub>3</sub> /Cu <sup>b</sup> | NH <sub>3</sub> TPD,<br>μmol |
|------------------------|--------------------|--------------------------------|-----------------------------------|-----------------------------------------------|----------------------------------|--------------------------------------|----------------------------------|------------------------------|
| 0.7% w/w Cu,<br>SAR=25 | 1.8                | 2.79                           | 8.02                              | 1.1                                           | 1.55                             | 3.60                                 | 3.60                             | 12.00                        |
| 1.7% w/w Cu,<br>SAR=25 | 4.3                | 6.19                           | 7.9                               | 1.2                                           | 1.44                             | 8.02                                 | 3.35                             | 15.43                        |
| 2.1% w/w Cu,<br>SAR=25 | 5.2                | 6.86                           | 7.07                              | 1.1                                           | 1.32                             | 10.10                                | 3.26                             | 15.10                        |
| 1.7% w/w Cu,<br>SAR=10 | 4.3                | 7.12                           | 6.20                              | 2.5                                           | 1.66                             | 7.67                                 | 3.56                             | 16.17                        |
| 1.7% w/w Cu,<br>SAR=13 | 4.3                | 7.03                           | 8.30                              | 2.0                                           | 1.63                             | 8.00                                 | 3.55                             | 16.90                        |
| 1.7% w/w Cu,<br>SAR=17 | 4.3                | 6.90                           | 8.90                              | 1.9                                           | 1.60                             | 8.41                                 | 3.55                             | 17.90                        |
| 1.7% w/w Cu,<br>SAR=22 | 4.3                | 6.06                           | 8.00                              | 1.7                                           | 1.41                             | 9.18                                 | 3.54                             | 15.90                        |

**Table S2** NH<sub>3</sub> adsorbed on different sites as estimated from NH<sub>3</sub>-TPD deconvolution under wet conditions

| SAMPLE                 | Cu loaded,<br>μmol | NH <sub>3</sub> Lewis,<br>μmol | NH <sub>3</sub> Bronsted,<br>μmol | NH <sub>3</sub> extra -<br>framework,<br>μmol | NH <sub>3</sub> /Cu <sup>a</sup> | NH <sub>3</sub> physisorbed,<br>μmol | NH <sub>3</sub> /Cu <sup>b</sup> | NH <sub>3</sub> TPD,<br>μmol |
|------------------------|--------------------|--------------------------------|-----------------------------------|-----------------------------------------------|----------------------------------|--------------------------------------|----------------------------------|------------------------------|
| 0.7% w/w Cu,<br>SAR=25 | 1.8                | 2.32                           | 8.38                              | /                                             | 1.28                             | 3.50                                 | 3.23                             | 10.50                        |
| 1.7% w/w Cu,<br>SAR=25 | 4.3                | 4.47                           | 8.67                              | /                                             | 1.04                             | 8.01                                 | 2.90                             | 13.20                        |
| 2.1% w/w Cu,<br>SAR=25 | 5.2                | 5.27                           | 8.07                              | /                                             | 1.00                             | 8.07                                 | 2.93                             | 13.40                        |
| 1.7% w/w Cu,<br>SAR=10 | 4.3                | 5.96                           | 7.54                              | /                                             | 1.28                             | 6.98                                 | 3.01                             | 13.62                        |
| 1.7% w/w Cu,<br>SAR=13 | 4.3                | 4.58                           | 9.50                              | /                                             | 1.07                             | 8.00                                 | 2.93                             | 14.08                        |
| 1.7% w/w Cu,<br>SAR=22 | 4.3                | 4.32                           | 9.28                              | /                                             | 1.00                             | 8.62                                 | 3.00                             | 13.60                        |

**Table S3.** Additional characterization measurements for the bare zeolites: BET surface area, pore volume, micropore area, micropore volume

| <b>SAMPLE</b> | <b>BET surface<br/>area (m<sup>2</sup>/g)</b> | <b>Pore volume<br/>[0.99ads]<br/>(cm<sup>3</sup>/g)</b> | <b>Micropore<br/>area<br/>(cm<sup>2</sup>/g)</b> | <b>Micropore<br/>volume<br/>(cm<sup>3</sup>/g)</b> |
|---------------|-----------------------------------------------|---------------------------------------------------------|--------------------------------------------------|----------------------------------------------------|
| <b>SAR 25</b> | 722                                           | 0.26                                                    | 718                                              | 0.25                                               |
| <b>SAR 13</b> | 644                                           | 0.23                                                    | 637                                              | 0.22                                               |
| <b>SAR 22</b> | 763                                           | 0.29                                                    | 729                                              | 0.25                                               |
